# Supplementary material for: Comprehensive untargeted lipidomic profiling of third generation lentiviral vectors and packaging cells
Source: Royal Society of Chemistry journal article supplement (doi:10.1039/d4mo00052h), 2024-10-01

**A**

In-house FBS QA: Normalized

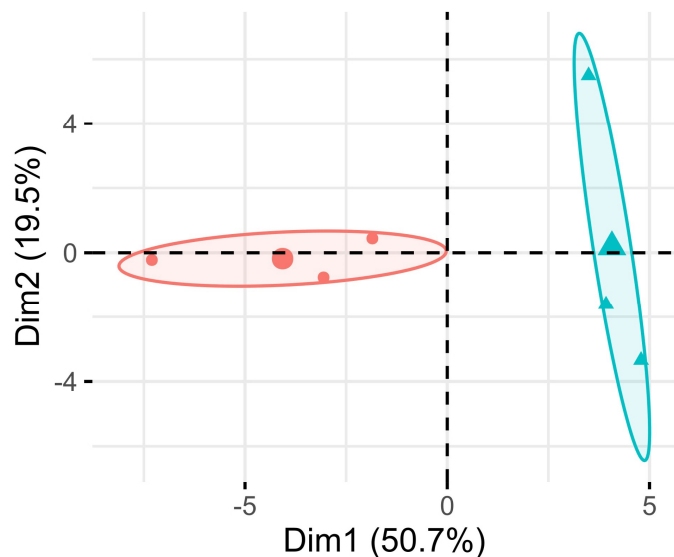

In-house FBS QA: Normalized & Batch Corrected

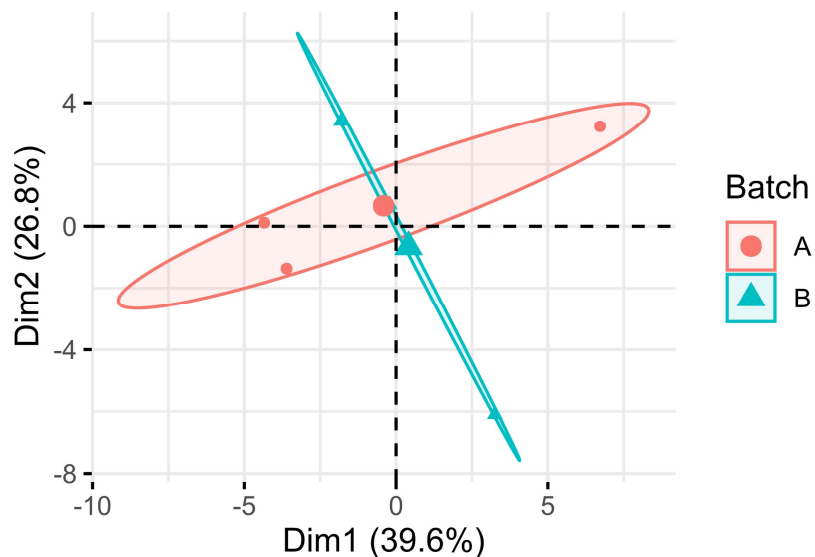

**B**

HEK 293T Producing Cells:  
Normalized

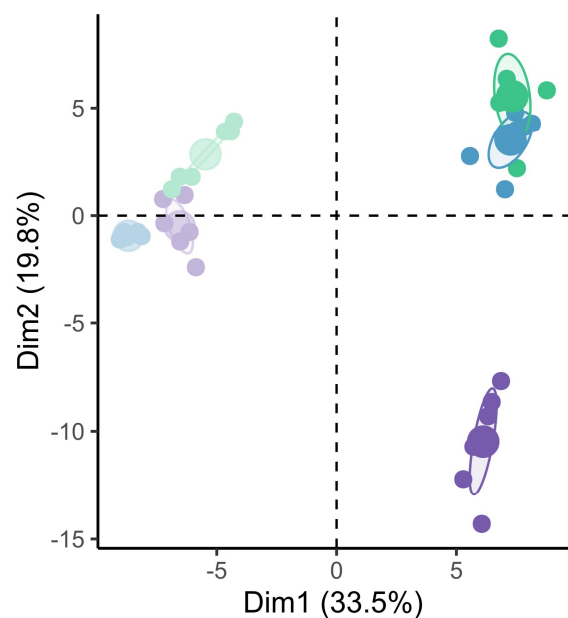

HEK 293T Producing Cells:  
Normalized & Batch Corrected

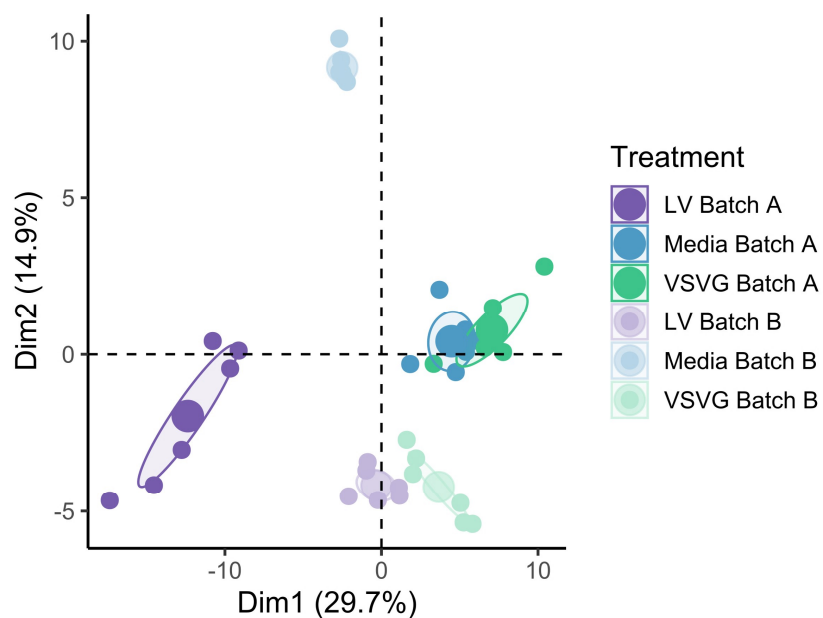

Supplement: d4mo00052h4.pdf [file d4mo00052h4.pdf]
