# Supplementary figures and images for: Comprehensive untargeted lipidomic profiling of third generation lentiviral vectors and packaging cells
Source: Royal Society of Chemistry journal article supplement (doi:10.1039/d4mo00052h), 2024-10-01

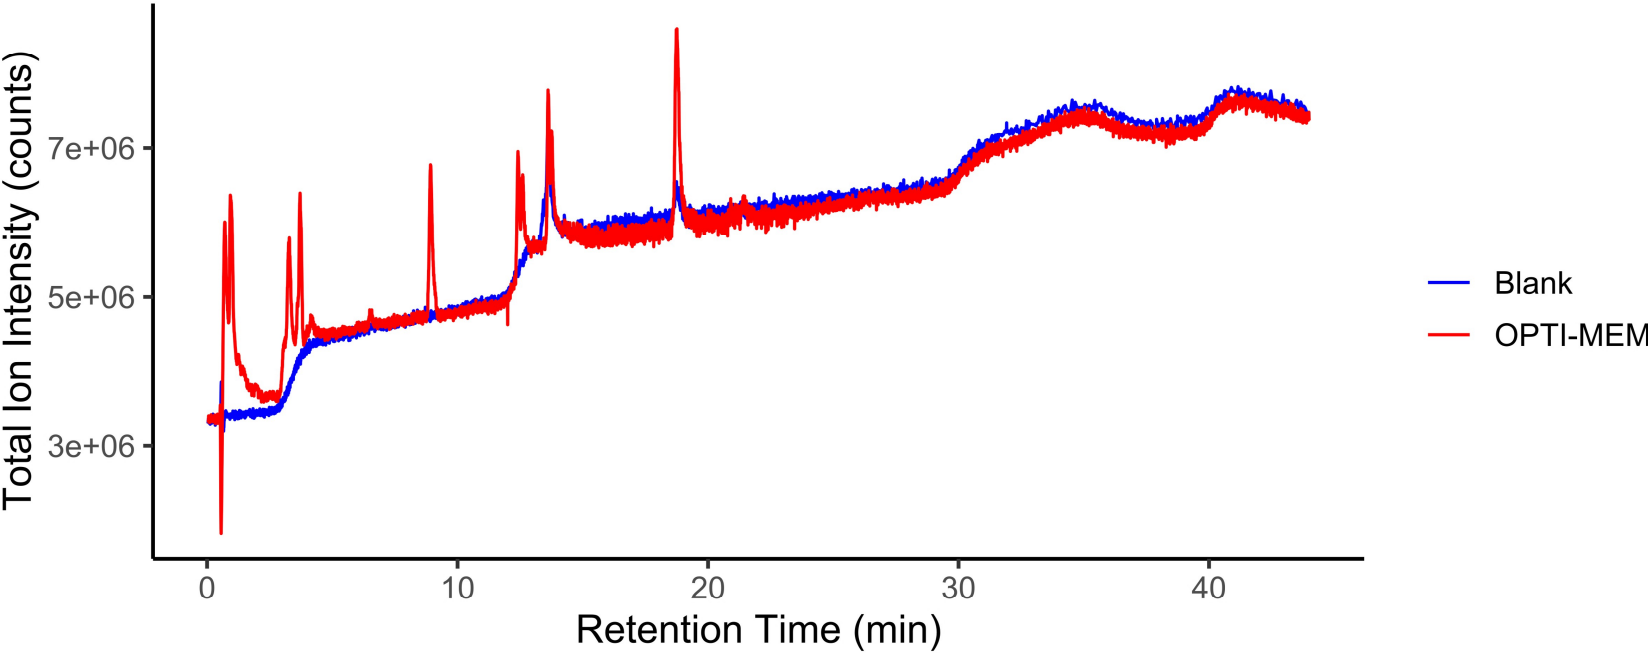

Supplement: d4mo00052h6.pdf [file d4mo00052h6.pdf]
